# Supplementary material for: A conformational equilibrium in the nitrogenase MoFe protein with an α-V70I amino acid substitution illuminates the mechanism of H2 formation
Source: Royal Society of Chemistry journal article supplement (doi:10.1039/d2fd00153e), 2023-01-01
Supplement: d2fd00153e1.pdf [file d2fd00153e1.pdf]

## Supporting Information

### A Conformational Equilibrium in the Nitrogenase MoFe Protein with an $\alpha$ -V70I Amino Acid Substitution Illuminates the Mechanism of $H_2$ Formation

Dmitriy A. Lukoyanov<sup>1</sup>, Zhi-Yong Yang<sup>2</sup>, Krista Shisler<sup>3</sup>, John W. Peters<sup>4</sup>, Simone Raugel<sup>5</sup>, Dennis R. Dean<sup>6</sup>, Lance C. Seefeldt<sup>2</sup>, and Brian M. Hoffman<sup>1</sup>

<sup>1</sup>Department of Chemistry and Molecular Biosciences, Northwestern University, Evanston, Illinois 60208, USA.

<sup>2</sup>Department of Chemistry and Biochemistry, Utah State University, Logan, Utah 84322, USA.

<sup>3</sup>Institute of Biological Sciences, Washington State University, Pullman, Washington, 99164, USA.

<sup>4</sup>Department of Chemistry and Biochemistry, University of Oklahoma, Norman, Oklahoma, 73019, USA.

<sup>5</sup>Physical and Computational Sciences Directorate, Pacific Northwest National Laboratory, Richland, Washington, 99352, USA.

<sup>6</sup>Biochemistry Department, Virginia Tech, Blacksburg, Virginia, 24061, USA.

**Table S1.** Detailed information of EPR and ENDOR samples with different MoFe protein variants studied in the present work.<sup>a</sup>

| $E_n$<br>state/Intermediate                          | MoFe protein<br>concentration<br>( $\mu$ M) | Fe protein<br>concentration<br>( $\mu$ M) | Substrate                           | pH/pD | Data<br>presented in |
|------------------------------------------------------|---------------------------------------------|-------------------------------------------|-------------------------------------|-------|----------------------|
| WT $E_0$                                             | 50                                          | —                                         | $H^+$ (1 atm Ar)                    | 7.0   | Figure 4 and 6       |
| $\alpha$ -V70I $E_0$                                 | 50                                          | —                                         | $H^+$ (1 atm Ar)                    | 7.0   | Figure 4 and 6       |
| <sup>95</sup> Mo-WT $E_0$                            | 150                                         | —                                         | $H^+$ (1 atm Ar)                    | 7.3   | Figure 4             |
| <sup>95</sup> Mo- $\alpha$ -V70I $E_0$               | 150                                         | —                                         | $H^+$ (1 atm Ar)                    | 7.3   | Figure 4             |
| $\alpha$ -V70I $E_0$ and $E_2$<br>(RFQ) <sup>b</sup> | 80                                          | 800                                       | $H^+$ (1 atm Ar)                    | 7.4   | Figure 5             |
| WT $E_0^c$                                           | 50                                          | 0.5                                       | $H^+$ (1 atm Ar)                    | 7.0   | Figure 6             |
| $\alpha$ -V70I $E_0^c$                               | 50                                          | 0.5                                       | $H^+$ (1 atm Ar)                    | 7.0   | Figure 6             |
| $\alpha$ -V70I $E_4(4H)$ and<br>$E_4(2H)^*$          | 150                                         | 120                                       | $D^+$ (1 atm Ar)                    | 7.1   | Figure 10            |
| $\alpha$ -V70I $E_4$                                 | 60                                          | 40                                        | $H^+/D^+$<br>(1 atm Ar/ $D_2/H_2$ ) | 7.3   | Figure S1            |

<sup>a</sup> Unless otherwise stated, all samples were prepared in a *ca.* 200 mM MOPS buffer, pH as specified in the table, with a MgATP regeneration system having final concentrations of *ca.* 13-15 mM ATP, 15-20 mM  $MgCl_2$ , *ca.* 20-25 mM phosphocreatine, 2.0 mg/mL BSA, 0.3 mg/mL creatine phosphokinase and *ca.* 40 mM sodium dithionite. For turnover samples with the presence of Fe protein, all reaction mixtures were incubated at room temperature for about 20-25 sec followed by rapid freezing in a pentane slurry and stored in liquid nitrogen before measurement. <sup>b</sup> The rapid freeze quenching samples were prepared as described earlier.<sup>1,2</sup> <sup>c</sup> The low flux ( $[MoFeP]:[FeP] = 100:1$ ) turnover samples were made after being incubated at room temperature for different times as indicated in Figure 6 before rapid freezing in a pentane slurry and stored in liquid nitrogen before measurement.

## Evidence for the presence of $E_4(2H)^*$ During Ar Turnover of $\alpha$ -V70I MoFe Protein

To support the identification of the  $g_1 = 2.11$   $S = 1/2$  EPR signal observed for  $\alpha$ -V70I under Ar turnover (**Fig 10**) with the  $E_4(2H)^*$  state we used as a probe its oxidative-addition reaction with  $D_2$ , to form the  $E_4(2H_2D)$  intermediate with two bridging deuterides. We had shown that the activated  $E_4(2H)^*$  state generated photochemically oxidatively adds  $H_2/D_2$  to form  $E_4(4H)/E_4(2H_2D)$ , **Scheme S1**.<sup>3</sup> In contrast, it has long been established that the only state that participates in the LT  $N_2$ -reduction catalytic cycle for WT enzyme of **Fig 1**, and that is capable of reacting with  $H_2/D_2$  is the  $E_4(2N_2H)$  state, which only forms during turnover under  $N_2$ , and which can undergo oxidative addition of  $H_2/D_2$  coupled with loss of  $N_2$  to generate  $E_4(4H)/E_4(2H_2D)$ . Thus, if the  $S = 1/2$  EPR signal observed in low levels during Ar turnover of  $\alpha$ -V70I is indeed  $E_4(2H)^*$ , then when  $\alpha$ -V70I is turned over under  $D_2$  a small steady-state population of the dideuteride  $E_4(2H^+, 2D^-)$  intermediate should develop along with the majority of  $E_4(4H)$ , **Scheme S1**.

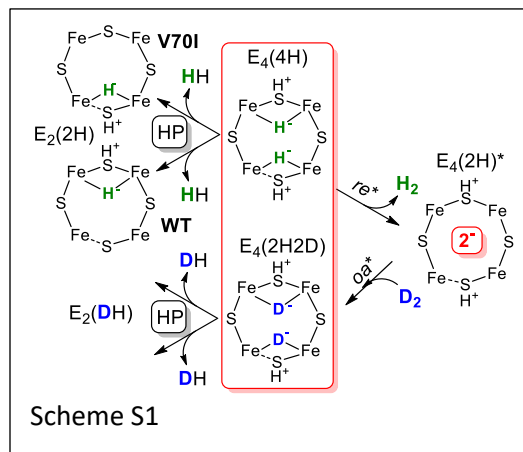

We previously showed that the apparent EPR linewidth of the  $E_4(4H)$  isotopologue is actually generated by hyperfine coupling to the bridging hydrides, and the apparent linewidth of  $E_4(4D)$  dideuteride state is correspondingly decreased.<sup>4</sup> The hyperfine-broadening effect for  $E_4(4H)$  EPR is particularly well exhibited in the shape of the  $g_3$  feature, which reveals resolved splitting arising from hyperfine couplings to two hydrides. Thus, if the observed  $g_1 = 2.11$   $S = 1/2$  signal indeed is associated with  $E_4(2H)^*$ , the  $E_4$  state accumulated during turnover in  $H_2O$  under  $D_2$  should exhibit a decrease in linewidth caused by the presence of the dideuteride isotopologue  $E_4(2H^+, 2D^-)$  and in the opposite case of turnover in  $D_2O$  under  $H_2$  the observed EPR linewidth of  $E_4$  state should slightly increase due to formation of the dihydride state  $E_4(2D^+, 2H^-)$ . As shown in **Figure S1**, the EPR signal of  $E_4$  trapped during

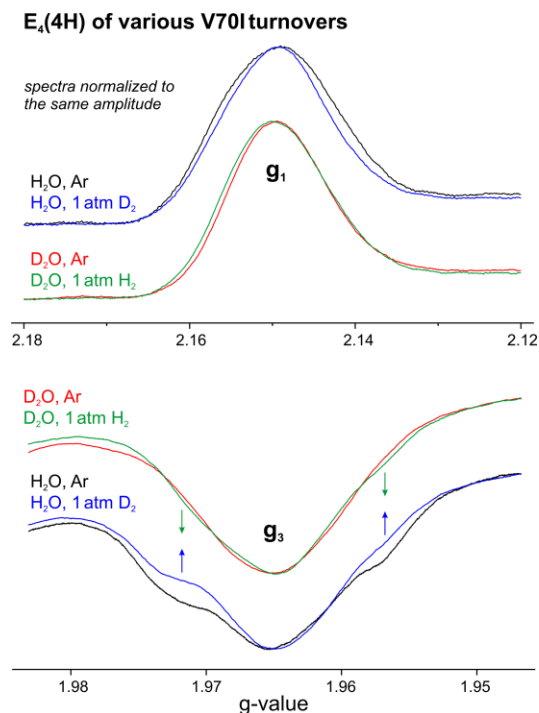

**Figure S1.** Expanded  $g_1$  and  $g_3$  portions of X-band EPR spectra of the  $E_4(4H)$  level intermediates showing effect of  $\alpha$ -V70I turnover conditions ( $H_2O$  vs  $D_2O$ ; Ar vs  $D_2$  and  $H_2$  atmosphere) on signal linewidth of trapped  $E_4$  state. **EPR conditions:** temperature, 12 K; microwave frequency,  $\sim 9.36$  GHz; microwave power, 10 mW; modulation amplitude, 3 G; time constant, 160 ms; field sweep speed, 5 G/s.

$\alpha$ -V70I turnover in H<sub>2</sub>O under D<sub>2</sub> indeed is narrower than that trapped under Ar, while E<sub>4</sub> trapped in D<sub>2</sub>O under H<sub>2</sub> exhibits hyperfine broadening, in particular a splitting of g<sub>3</sub> feature caused by hydrides of the E<sub>4</sub>(2D<sup>+</sup>, 2H<sup>-</sup>) isotopologue formed during turnover. Thus it can be concluded that the newly observed g<sub>1</sub> = 2.11 S = 1/2 signal is truly associated with E<sub>4</sub>(2H)\*.

With this identification, we confirm that the E<sub>4</sub>(2H)\* intermediate accumulates in low occupancy during turnover of  $\alpha$ -V70I under Ar. Indeed, this has led us to recognize that the signal was present in earlier  $\alpha$ -V70I turnover spectra.<sup>5,6</sup> As noted above, WT nitrogenase does not react with H<sub>2</sub>/D<sub>2</sub> unless N<sub>2</sub> is present, establishing that the E<sub>4</sub>(2H)\* state, which has that ability, does not occur during turnover of the WT enzyme: N<sub>2</sub> binding/reduction and hydride *re* in WT enzyme are fully concerted, **Fig 1**.

## References

- (1) Kim, S. H.; Perera, R.; Hager, L. P.; Dawson, J. H.; Hoffman, B. M. Rapid Freeze-Quench ENDOR Study of Chloroperoxidase Compound I: The Site of the Radical. *J. Am. Chem. Soc.* **2006**, *128*, 5598-5599.
- (2) Danyal, K.; Shaw, S.; Page, T. R.; Duval, S.; Horitani, M.; Marts, A. R.; Lukoyanov, D.; Dean, D. R.; Raugei, S.; Hoffman, B. M.; Seefeldt, L. C.; Antony, E. Negative Cooperativity in the Nitrogenase Fe Protein Electron Delivery Cycle. *PNAS* **2016**, *113*, E5783-E5791.
- (3) Lukoyanov, D.; Khadka, N.; Yang, Z. Y.; Dean, D. R.; Seefeldt, L. C.; Hoffman, B. M. Reversible Photoinduced Reductive Elimination of H<sub>2</sub> from the Nitrogenase Dihydride State, the E<sub>4</sub>(4H) Janus Intermediate. *J. Am. Chem. Soc.* **2016**, *138*, 1320-1327.
- (4) Lukoyanov, D.; Khadka, N.; Yang, Z. Y.; Dean, D. R.; Seefeldt, L. C.; Hoffman, B. M. Reductive Elimination of H<sub>2</sub> Activates Nitrogenase to Reduce the N $\equiv$ N Triple Bond: Characterization of the E<sub>4</sub>(4H) Janus Intermediate in Wild-Type Enzyme. *J. Am. Chem. Soc.* **2016**, *138*, 10674-10683.
- (5) Igarashi, R. Y.; Laryukhin, M.; Dos Santos, P. C.; Lee, H. I.; Dean, D. R.; Seefeldt, L. C.; Hoffman, B. M. Trapping H<sup>-</sup> Bound to the Nitrogenase FeMo-Cofactor Active Site During H<sub>2</sub> Evolution: Characterization by ENDOR Spectroscopy. *J. Am. Chem. Soc.* **2005**, *127*, 6231-6241.
- (6) Lukoyanov, D.; Barney, B. M.; Dean, D. R.; Seefeldt, L. C.; Hoffman, B. M. Connecting Nitrogenase Intermediates with the Kinetic Scheme for N<sub>2</sub> Reduction by a Relaxation Protocol and Identification of the N<sub>2</sub> Binding State. *PNAS* **2007**, *104*, 1451-1455.
